# Supplementary material for: Efficient removal of Pb(ii) and Cr(vi) from acidic wastewater using porous thiophosphoryl polyethyleneimine
Source: Royal Society of Chemistry journal article supplement (doi:10.1039/d1nj02480a), 2021-01-01
Supplement: d1nj02480a7.pdf [file d1nj02480a7.pdf]

**Manuscript ID NJ-ART-05-2021-002480**

**Efficient removal of Pb(II) and Cr(VI) from acidic wastewater by porous thiophosphoryl polyethyleneimine**

Junhua Sun<sup>a</sup>, Guoxin Sun<sup>a,b</sup>, Xiuxian Zhao<sup>b</sup>, Heng Zhao<sup>a</sup>,  
Zhongjiang Yang<sup>a</sup>, Liangguo Yan<sup>c</sup>, Xuchuan Jiang<sup>b,\*</sup>, Yu Cui<sup>a,\*</sup>

<sup>a</sup> School of Chemistry and Chemical Engineering, University of Jinan, No. 336  
Nanxinzhuang West Road, 250022 Jinan, PR China

<sup>b</sup> Institute for Smart Materials & Engineering, University of Jinan, No. 336  
Nanxinzhuang West Road, 250022 Jinan, PR China

<sup>c</sup> School of Water Conservancy and Environment, University of Jinan, No. 336  
Nanxinzhuang West Road, 250022 Jinan, PR China

\* **Corresponding author:** E-mail: [chm\\_cuiy@ujn.edu.cn](mailto:chm_cuiy@ujn.edu.cn) (Y. Cui), [ism\\_jiangxc@ujn.edu.cn](mailto:ism_jiangxc@ujn.edu.cn)

[\(X.C. Jiang\)](#)

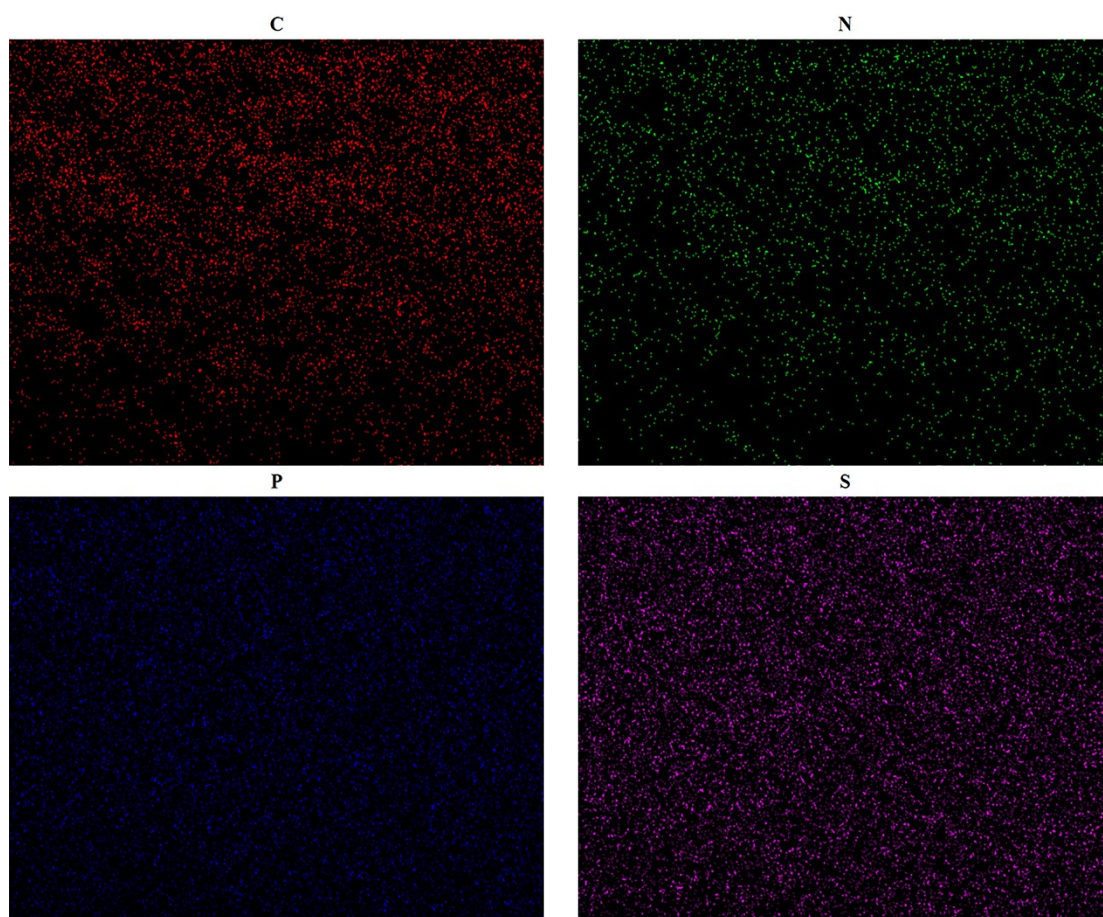

**Fig. S1** EDS mapping images of the adsorbent.

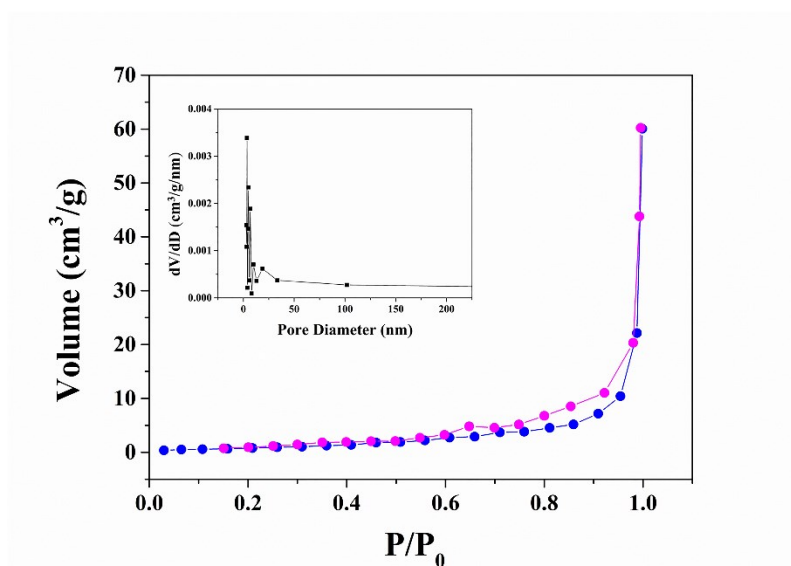

**Fig. S2** N<sub>2</sub> adsorption–desorption isotherms of TPEI (inset: the corresponding pore size distribution curves).

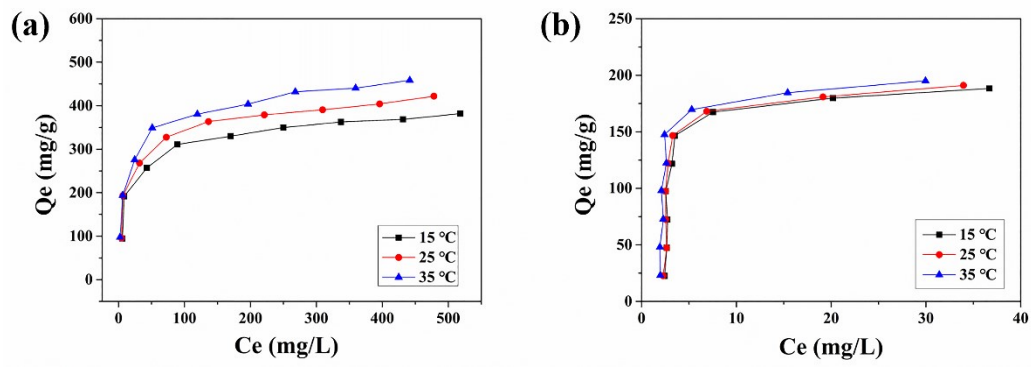

**Fig. S3** Adsorption isotherms of Pb(II) and Cr(VI) at different temperatures.

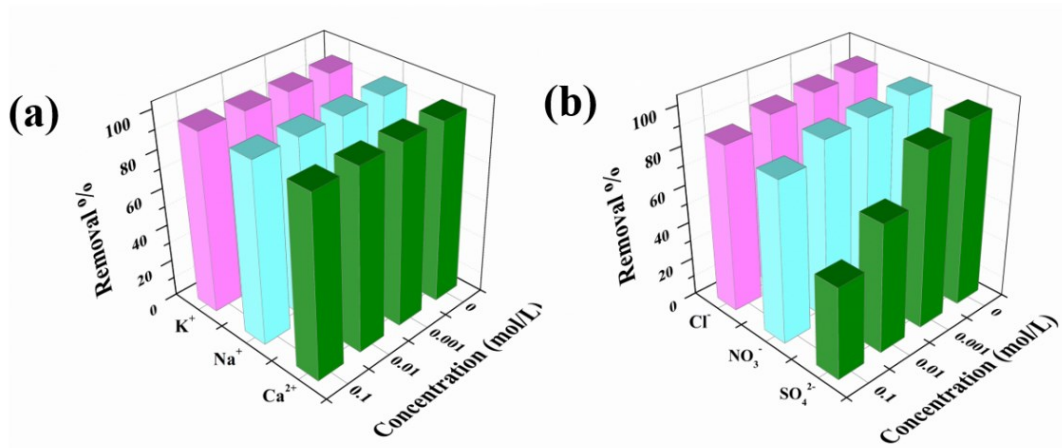

**Fig. S4** Influence of competitive ions on Pb(II) (a) and Cr(VI) (b) adsorption.

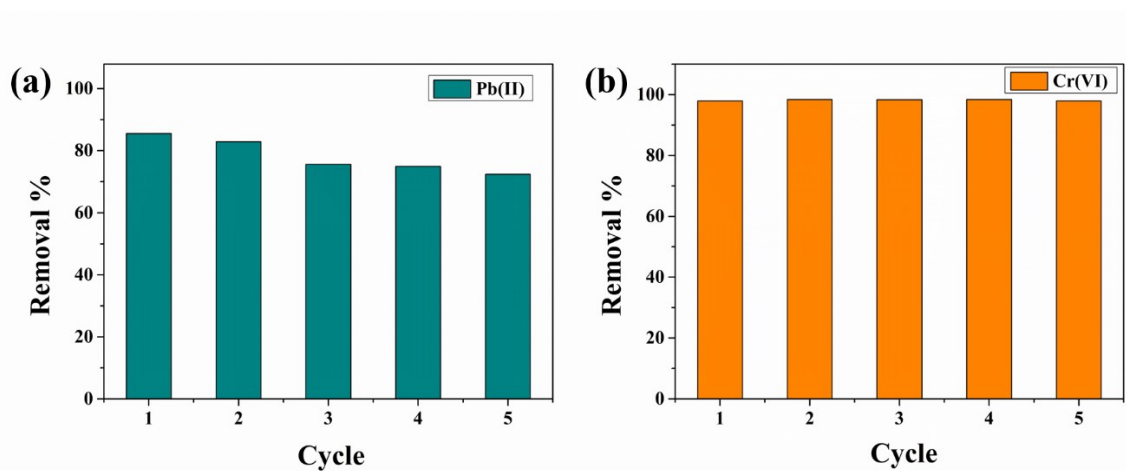

**Fig. S5** The reusability of TPEI for removal of Pb(II) (a) and Cr(VI) (b).

**Table S1.** EDS elemental analysis of the adsorbent.

| Elt. | Line | Intensity (c/s) | Conc.   | Units | Error 2-sig | MDL 3-sig |       |
|------|------|-----------------|---------|-------|-------------|-----------|-------|
| C    | Ka   | 60.50           | 39.615  | wt. % | 2.161       | 1.685     |       |
| N    | Ka   | 22.85           | 29.651  | wt. % | 2.730       | 2.332     |       |
| P    | Ka   | 186.17          | 15.955  | wt. % | 0.460       | 0.260     |       |
| S    | Ka   | 148.36          | 14.779  | wt. % | 0.481       | 0.286     |       |
|      |      |                 | 100.000 | Wt. % |             |           | Total |

**Table S2.** Related parameters from kinetics equation.

| Metal ion | C <sub>0</sub> (ppm) | Q <sub>exp</sub> (mg/g) | Pseudo-first-order model                          |                         |                | Pseudo-second-order model |                         |                |
|-----------|----------------------|-------------------------|---------------------------------------------------|-------------------------|----------------|---------------------------|-------------------------|----------------|
|           |                      |                         | K <sub>1</sub> (min <sup>-1</sup> ) <sup>1)</sup> | Q <sub>cal</sub> (mg/g) | R <sup>2</sup> | K <sub>2</sub> (g/mg/min) | Q <sub>cal</sub> (mg/g) | R <sup>2</sup> |
| Pb(II)    | 100                  | 95.50                   | 0.1511                                            | 33.5575                 | 0.8062         | 0.0115                    | 97.1817                 | 0.9998         |
| Cr(VI)    | 100                  | 97.90                   | 0.1790                                            | 7.8321                  | 0.8441         | 0.0565                    | 98.3284                 | 0.9999         |

**Table S3.** Related parameters from isotherm equation.

| Metal ion | Temperature (°C) | Langmuir isotherm       |                       |                             | Freundlich isotherm   |        |                             |
|-----------|------------------|-------------------------|-----------------------|-----------------------------|-----------------------|--------|-----------------------------|
|           |                  | Q <sub>max</sub> (mg/g) | K <sub>L</sub> (L/mg) | R <sub>L</sub> <sup>2</sup> | K <sub>F</sub> (mg/g) | n      | R <sub>F</sub> <sup>2</sup> |
| Pb(II)    | 15 °C            | 389.10                  | 0.0485                | 0.9982                      | 87.50                 | 3.9936 | 0.8274                      |
|           | 25 °C            | 425.53                  | 0.0530                | 0.9976                      | 94.06                 | 3.8730 | 0.8394                      |
|           | 35 °C            | 462.96                  | 0.0604                | 0.9972                      | 103.66                | 3.8270 | 0.9023                      |
| Cr(VI)    | 15 °C            | 193.80                  | 0.8012                | 0.9997                      | 131.72                | 9.7380 | 0.9272                      |
|           | 25 °C            | 196.85                  | 0.7937                | 0.9993                      | 132.17                | 9.3397 | 0.9320                      |
|           | 35 °C            | 200.80                  | 0.9920                | 0.9995                      | 137.49                | 9.3861 | 0.9394                      |

**Table S4.** Comparison of the adsorption capacity, equilibrium time and pH of TPEI with other adsorbents for Pb(II).

| Adsorbents                                                           | Adsorption capacity (mg/g) | Equilibrium time (min) | pH       | Referees         |
|----------------------------------------------------------------------|----------------------------|------------------------|----------|------------------|
| UiO-66-RSA                                                           | 189.8                      | ~180                   | 4        | [32]             |
| Magnetic polyethyleneimine lignin                                    | 96.6                       | 60                     | 6        | [33]             |
| TEPA modified chitosan /CoFe <sub>2</sub> O <sub>4</sub> particles   | 228.311                    | 50                     | 5        | [34]             |
| CeO <sub>2</sub> -MoS <sub>2</sub> hybrid magnetic biochar           | 263.6                      | 180                    | 4        | [35]             |
| Fe-Mn-S@HCS                                                          | 181.5                      | 600                    | 7        | [36]             |
| Cotton fiber functionalized with tetraethylenepentamine and chitosan | 123.46                     | 120                    | 5        | [37]             |
| EDTA functionalized chitosan/ polyacrylamide hydrogel                | 138.41                     | 170                    | 5        | [38]             |
| Spherical PVA/ATP composites                                         | 45.87                      | 720                    | 5        | [39]             |
| PVA/PAA nanofibers                                                   | 159                        | 120                    | 5        | [40]             |
| CPEI                                                                 | 1.01                       | /                      | 3        | [20]             |
| CPEID                                                                | 452.49                     | 40                     | 7        | [21]             |
| <b>TPEI</b>                                                          | <b>421.9</b>               | <b>25</b>              | <b>3</b> | <b>This work</b> |

**Table S5.** Comparison of the adsorption capacity, equilibrium time and pH of TPEI with other adsorbents for Cr(VI).

| Adsorbents                                                     | Adsorption capacity (mg/g) | Equilibrium time (min) | pH       | Referees         |
|----------------------------------------------------------------|----------------------------|------------------------|----------|------------------|
| Chitosan crosslinked modified silicon material                 | 28.88                      | 240                    | 5~6      | [41]             |
| Modified chitosan gel                                          | 83.33                      | 100                    | 3        | [42]             |
| CYPH@IL101/chitosan capsule                                    | 104.38                     | > 960                  | 3        | [43]             |
| Chitosan/NiFe <sub>2</sub> O <sub>4</sub> (CNF) nanocomposites | 31.523                     | 120                    | 2        | [44]             |
| PD-Fe <sub>3</sub> O <sub>4</sub> @CCS                         | 129.03                     | 75                     | 3        | [45]             |
| (CPC)-modified montmorillonite                                 | 43.84                      | 60                     | 2        | [46]             |
| Mts-APTES/GO-OA interstratified composites                     | 44.25                      | 30                     | 3        | [47]             |
| Wool keratin/PET composite nanofiber membrane                  | 75.86                      | 720                    | 3        | [48]             |
| Magnetic phoenix tree leaves-derived biochar composite         | 55.0                       | 1440                   | 2        | [49]             |
| CPEI                                                           | 1.43                       | /                      | 3        | [20]             |
| <b>TPEI</b>                                                    | <b>191.04</b>              | <b>10</b>              | <b>2</b> | <b>This work</b> |
